# Supplementary material for: Liver X Receptors Protect from Development of Prostatic Intra-Epithelial Neoplasia in Mice
Source: PLoS Genet. 2013 May 9;9(5):e1003483. doi: 10.1371/journal.pgen.1003483 (PMC3649972; doi:10.1371/journal.pgen.1003483)
Supplement: Dataset S2 — List of 146 “Cancer” Genes Identified Using Ingenuity Pathway Analysis. (XLSX) [file pgen.1003483.s002.xlsx]

## Sheet: Sheet0
© 2000-2010 Ingenuity Systems, Inc. All rights reserved.
Symbol	Synonym(s)	Entrez Gene Name	Agilent	Log Ratio	p-value	Networks	Location	Type(s)	Biomarker Application(s)	Drug(s)	Entrez Gene ID for Human	Entrez Gene ID for Mouse	Entrez Gene ID for Rat
ABP1	1600012D06Rik, ABP, Amiloride binding, AOC1, DAO, DAO1, Diamine Oxidase, HISTAMINASE, KAO, Kidney amine oxidase	amiloride binding protein 1 (amine oxidase (copper-containing))	A_51_P212068	2,996	3,83E-07	21	Extracellular Space	enzyme			26	76507	65029
AGR2	AG2, Agr2h, GOB-4, HAG-2, HPC8, mAG-2, PDIA17, XAG-2	anterior gradient homolog 2 (Xenopus laevis)	A_51_P209122	-1,327	2,33E-08	20	Extracellular Space	other	Diagnosis		10551	23795	298961
AHR	Ah, AH RECEPTOR, Ahh, Ahre, bHLHe76, DIOXIN RECEPTOR, DR, In	aryl hydrocarbon receptor	A_51_P449133	0,870	9,81E-08	3	Nucleus	ligand-dependent nuclear receptor			196	11622	25690
ANLN	1110037A17Rik, 2900037I21RIK, ANILLIN, C78101, DKFZp779A055, RGD1566097, scra, Scraps	anillin, actin binding protein	A_52_P512955	-1,695	2,69E-09	7	Cytoplasm	other	Prognosis		54443	68743	307056
ANPEP	AAP, Ala(Leu-Gly)-Aminopeptidase, AMINOPEPTIDASE M, AMINOPEPTIDASE N, APM, APN, CD13, GP150, Kidney Aminopeptidase M, KZP, LAP1, P150, PEPN	alanyl (membrane) aminopeptidase	A_51_P231184	2,539	3,38E-16	1	Plasma Membrane	peptidase	Safety		290	16790	81641
ANXA9	1110003P15Rik, 2310069F17Rik, ANX31, LOC681869, PEMPHAXIN	annexin A9	A_51_P451482	3,274	5,64E-19	13	Plasma Membrane	transmembrane receptor			8416	71790	689830
APOA5	1300007O05Rik, APOA-V, FLJ97995, MGC108612, MGC126836, MGC126838, RAP3	apolipoprotein A-V	A_52_P292404	-2,051	1,49E-12	5	Extracellular Space	other			116519	66113	140638
BCL11A	2810047E18Rik, BCL11A-L, BCL11A-S, BCL11A-XL, CTIP, CTIP1, D930021L15RIK, EVI9, FLJ10173, FLJ34997, HBFQTL5, KIAA1809, mKIAA1809, ZNF856	B-cell CLL/lymphoma 11A (zinc finger protein)	A_51_P262998	1,709	3,14E-10	4	Nucleus	transcription regulator			53335	14025	305589
BMP7	OP-1, osteogenic protein 1	bone morphogenetic protein 7	A_52_P278354	-1,454	2,44E-09	6	Extracellular Space	growth factor	Diagnosis		655	12162	85272
C1R	AI132558, C1ra, C1rb, COMPLEMENT COMPONENT 1, R SUBCOMPONENT, Gm8551, mC1rA, mC1rB, Similar to c1r	complement component 1, r subcomponent	A_52_P114260	-1,187	2,84E-07	9, 19	Extracellular Space	peptidase		SERPING1	715	667277|50909	312705
CA2	AI131712, CA-II, Car2, Carbonic anhydrase 2, Ltw-5, Lvtw-5	carbonic anhydrase II	A_51_P455647	1,182	3,12E-07	12	Cytoplasm	enzyme	Diagnosis, Unspecified Application	methazolamide, hydrochlorothiazide, acetazolamide, trichloromethiazide, dorzolamide, chlorothiazide, dorzolamide/timolol, brinzolamide, chlorthalidone, benzthiazide, sulfacetamide, topiramate	760	12349	54231
CAPG	AFCP, GCAP39, MACHROPHAGE CAPPING, Mbh1, MCP	capping protein (actin filament), gelsolin-like	A_51_P273921	1,757	1,46E-11	1	Nucleus	other			822	12332	297339
CASP7	AI314680, CASPASE7, CMH-1, ICE-IAP3, ICE-LAP3, Lice2 cysteine protease, mCASP-7, MCH3	caspase 7, apoptosis-related cysteine peptidase	A_51_P414548	-1,503	1,07E-09	11	Cytoplasm	peptidase	Prognosis		840	12369	64026
CCL21	6CKBAC1, 6CKBAC2, 6CKINE, AI159701, ALP, AW987545, Beta chemokine tca4, Ccl21a, Ccl21b, Ccl21c, CKb9, ECL, ENSMUSG00000073869, ENSMUSG00000073878, Exodus-2, Gm10591, Gm13304, Gm1987, LOC100041504, LOC100041593, MGC105669, MGC107632, MGC34555, OTTMUSG00000011350, Plt, SCYA21, SCYA21A, Scya21b, Scya21c, SLC, TCA4	chemokine (C-C motif) ligand 21	A_51_P129480	1,284	5,07E-08	22	Extracellular Space	cytokine	Disease Progression		6366	100041593|18829|100038965|65956|100042544|100041504|100042493|100039131	298006
CCND2	2600016F06RIK, AI256817, BF642806, C86853, cD2, CYCLIN D2, CYL2, KIAK0002, MGC102758, MGC142404, Vin-1	cyclin D2	A_51_P433228	1,488	1,36E-09	3	Nucleus	other	Diagnosis, Efficacy, Prognosis, Response to Therapy		894	12444	64033
CD14	CD14 ANTIGEN, lipopolysaccharide (LPS) receptor	CD14 molecule	A_51_P172853	1,639	1,16E-10	9	Plasma Membrane	transmembrane receptor	Efficacy		929	12475	60350
CD28	CD28 ANTIGEN, CD28I, CD28RNA, MGC138290, Tp44	CD28 molecule	A_52_P162967	-1,389	1,76E-17	22, 24	Plasma Membrane	other	Efficacy		940	12487	25660
CDH11	CAD11, Cadherin 11, CDH11 isoform 1, CDHOB, MGC25339, OB, OB CADHERIN 1, Ob-cadherin, OSF-4	cadherin 11, type 2, OB-cadherin (osteoblast)	A_52_P437795	1,403	3,30E-07	6, 16	Plasma Membrane	other	Efficacy, Prognosis		1009	12552	84407
CDKN2B	AV083695, CDK4I, INK4B, MTS2, P15, p15(INK4b), P15INK4B, TP15	cyclin-dependent kinase inhibitor 2B (p15, inhibits CDK4)	A_52_P498241	1,355	6,12E-08	8	Nucleus	transcription regulator	Diagnosis, Prognosis		1030	12579	25164
CEBPD	C/EBP DELTA, C/EBPd, Ccaat/enhancer binding protein delta, CEBP DELTA, CELF, CRP3, NF-IL6BETA	CCAAT/enhancer binding protein (C/EBP), delta	A_51_P444447	1,836	4,16E-12	8	Nucleus	transcription regulator			1052	12609	25695
CHRDL2	1810022C01RIK, BNF1, CHL2, DKFZp586N2124, FKSG37	chordin-like 2	A_51_P505571	1,452	4,30E-09	6	Extracellular Space	other			25884	69121	308854
CLIC5	5730531E12Rik, B330005L24, CLIC5A, CLIC5B, dJ447E21.4, FLJ90663, Gm322, jbg, MST130, MSTP130	chloride intracellular channel 5	A_51_P193993	-2,038	2,37E-13	2	Cytoplasm	ion channel			53405	224796	94272
COLEC12	CL-P1, MGC114569, NSR2, SCARA4, SRCL	collectin sub-family member 12	A_52_P527625	1,610	4,63E-10	10	Plasma Membrane	transmembrane receptor			81035	140792	361289
CRABP1	AI326249, Cellular retinoic acid binding, CRABP, CRABP-I, RBP5	cellular retinoic acid binding protein 1	A_52_P185907	4,658	2,10E-20	8	Cytoplasm	transporter	Diagnosis, Unspecified Application		1381	12903	25061
CRYAB	AACRYA, ABC, ALPHA B CRYSTALLIN, Alpha crystallin b chain, CRYA2, CRYSTALLIN ALPHA 2, CRYSTALLIN ALPHA B, CTPP2, Heat-shock 20 kDa like, HSPB5	crystallin, alpha B	A_51_P504423	1,149	7,76E-07	11	Nucleus	other	Diagnosis, Unspecified Application		1410	12955	25420
CTGF	AMPHIROGULIN, CCN2, CTGF isoform 1, CTGRP, Fibroblast-inducible secreted, Fisp12, HCS24, IGFBP-RP2, IGFBP8, MGC102839, MGC138005, NOV2, Tissue growth factor	connective tissue growth factor	A_51_P157042	3,073	2,14E-18	2	Extracellular Space	growth factor	Diagnosis, Efficacy		1490	14219	64032
CXADR	2610206D03RIK, AU016810, AW553441, CAR, CAR VIRUS RECEPTOR, Car1, CAR4/6, COXSACKIE VIRUS AND ADENOVIRUS RECEPTOR, HCAR, MCAR, MCVADR, MGC109536	coxsackie virus and adenovirus receptor	A_51_P212308	1,654	8,82E-11	8	Plasma Membrane	transmembrane receptor			1525	13052	89843
CXCL9	BB139920, CMK, crg-10, Humig, MGC105312, MIG, SCYB9	chemokine (C-X-C motif) ligand 9	A_51_P461665	-3,919	1,38E-20	9	Extracellular Space	cytokine	Diagnosis, Efficacy		4283	17329	246759
CXCL13	ANGIE, ANGIE2, BCA-1, BLC, BLC1, BLR1L, CXC CHEMOKINE, Loc498335, SCYB13	chemokine (C-X-C motif) ligand 13	A_51_P378789	1,642	5,69E-10	6	Extracellular Space	cytokine	Efficacy, Prognosis		10563	55985	498335
CXCL16	0910001K24Rik, AV290116, BB024863, CX3CL16, CXCLG16, SR-PSOX, Zmynd15	chemokine (C-X-C motif) ligand 16	A_51_P374203	1,664	7,15E-11	9	Extracellular Space	cytokine	Diagnosis, Unspecified Application		58191	66102	497942
CYP2A6	AI893559, Coh, CPA6, Cyp15a1, Cyp15a2, CYP2A, Cyp2a3, Cyp2a3a, CYP2A4, Cyp2a4/5, CYP2A5, Cyp2a6/7, D7Ucla4, P450C2A, P450PB, RATCYP2A3A	cytochrome P450, family 2, subfamily A, polypeptide 6	A_52_P246252	2,137	1,82E-07	3	Cytoplasm	enzyme			1548	13086|13087	24299
CYP2B9	Cyp2b	cytochrome P450, family 2, subfamily b, polypeptide 9	A_51_P467076	1,577	2,99E-10	5	Cytoplasm	enzyme				13094
CYP2B13	Cyp2b3, Cyp2b6, P-450pb-b, RGD:619923	cytochrome P450, family 2, subfamily b, polypeptide 13	A_51_P492339	1,378	9,81E-09	5	Cytoplasm	enzyme				13089	286953
CYR61	AI325051, CCN1, Cysteine-rich protein 61, GIG1, IGFBP10, MGC93040	cysteine-rich, angiogenic inducer, 61	A_51_P252859	1,281	6,12E-08	6	Extracellular Space	other			3491	16007	83476
DACH1	AI182278, Dac, DACH, E130112M23Rik, FLJ10138	dachshund homolog 1 (Drosophila)	A_52_P309022	-1,345	1,68E-08	3	Nucleus	transcription regulator			1602	13134
DEFB1	AW260221, BD-1, Beta Defensin, Beta defensin1, DEFB101, HBD-1, mBD-1, MGC51822	defensin, beta 1	A_52_P321140	-2,051	1,65E-13	1	Extracellular Space	other	Diagnosis, Unspecified Application		1672	13214	83687
EDNRA	ENDOR, ENDOTHELIN RECEPTOR TYPE A, ET-AR, Et1 receptor, ETA, ETA RECEPTOR, ETRA, Gpcr10, RATENDOR	endothelin receptor type A	A_52_P156190	1,150	5,63E-07	2	Plasma Membrane	transmembrane receptor		bosentan, avosentan, clazosentan, ambrisentan, sitaxsentan, ZD4054, SB 234551, TBC 3214, BSF 302146, PD 180988, atrasentan	1909	13617	24326
ESR1	AA420328, Alpha estrogen receptor, AU041214, DKFZp686N23123, ER, ER ALPHA, Er alpha (46 kDa isoform), ER66, ERA, ER[a], ESR, ESRA, ESTR, ESTRA, ESTROGEN RECEPTOR ALPHA, ESTROGEN RECEPTOR1, NR3A1, RNESTROR, TERP-1	estrogen receptor 1	A_52_P237077	-1,007	6,86E-10	3	Nucleus	ligand-dependent nuclear receptor	Diagnosis, Efficacy, Prognosis	17-alpha-ethinylestradiol, fulvestrant, beta-estradiol, estradiol 17beta-cypionate, estrone, estradiol valerate, 3-(4-methoxy)phenyl-4-((4-(2-(1-piperidinyl)ethoxy)phenyl)methyl)-2H-1-benzopyran-7-ol, bazedoxifene, estradiol valerate/testosterone enanthate, TAS-108, ethinyl estradiol/ethynodiol diacetate, estradiol acetate, esterified estrogens, estradiol cypionate/medroxyprogesterone acetate, co…	2099	13982	24890
ESR2	BETA ESTROGEN RECEPTOR, ER-BETA, ERB, ERB2, ER[b], ESR-BETA, ESRB, ESTRB, ESTROGEN RECEPTOR BETA, NR3A2	estrogen receptor 2 (ER beta)	A_52_P156314	-1,179	5,08E-13	3	Nucleus	ligand-dependent nuclear receptor	Diagnosis, Efficacy, Prognosis, Response to Therapy	17-alpha-ethinylestradiol, fulvestrant, beta-estradiol, estradiol 17beta-cypionate, estrone, estradiol valerate, 3-(4-methoxy)phenyl-4-((4-(2-(1-piperidinyl)ethoxy)phenyl)methyl)-2H-1-benzopyran-7-ol, bazedoxifene, estradiol valerate/testosterone enanthate, TAS-108, ethinyl estradiol/ethynodiol diacetate, estradiol acetate, esterified estrogens, estradiol cypionate/medroxyprogesterone acetate, co…	2100	13983	25149
F2	Cf-2, Coagulation factor 2, Coagulation Factor II, DCP, factor IIa, FII, Meizothrombin Des-Fragment 1, PROTHROMBIN, PT, THROMBIN	coagulation factor II (thrombin)	A_51_P480311	-3,143	9,66E-11	11	Extracellular Space	peptidase	Diagnosis	enoxaparin, desirudin, dabigatran etexilate, antithrombin alfa, argatroban, bivalirudin, lepirudin	2147	14061	29251
FGL1	Frep1, Hepassocin, HFREP1, HP-041, LFIRE1, Mfire1, MGC108569, MGC12455, MGC37822	fibrinogen-like 1	A_52_P294510	-1,334	2,05E-08	17	Extracellular Space	other	Unspecified Application		2267	234199	246186
FOS	AP-1, C-FOS, D12Rfj1, V-FOS	FBJ murine osteosarcoma viral oncogene homolog	A_52_P262219	1,315	8,01E-16	8	Nucleus	transcription regulator	Efficacy, Prognosis		2353	14281	314322
GABRG1	DKFZp686H2042, Gaba receptor gamma1, GABAA, GabaA/BZ, MGC107399, MGC33838	gamma-aminobutyric acid (GABA) A receptor, gamma 1	A_51_P396883	1,120	6,81E-12	14	Plasma Membrane	ion channel		pagoclone, alphadolone, SEP 174559, tracazolate, sevoflurane, isoflurane, gaboxadol, isoniazid, felbamate, etomidate, muscimol, halothane, fluoxetine/olanzapine, estazolam, clorazepate, eszopiclone, quazepam, amitriptyline/chlordiazepoxide, temazepam, zolpidem, chlordiazepoxide, lorazepam, olanzapine, triazolam, clonazepam, flurazepam, midazolam, oxazepam, zaleplon, secobarbital, phenobarbital, p…	2565	14405	140674
GAD2	6330404F12RIK, GAD(65), Gad6, GAD65, MGC161605, MGC161607	glutamate decarboxylase 2 (pancreatic islets and brain, 65kDa)	A_51_P452977	3,978	1,71E-14	9	Cytoplasm	enzyme		valproic acid	2572	14417	24380
GALNT3	DKFZp686C10199, GALNAC-T3, HFTC, HHS, MGC124508, MGC61909, Ppgantase t3	UDP-N-acetyl-alpha-D-galactosamine:polypeptide N-acetylgalactosaminyltransferase 3 (GalNAc-T3)	A_51_P380005	1,401	6,35E-09	14	Cytoplasm	enzyme	Disease Progression		2591	14425	366061
GJA1	AU042049, AW546267, CNX43, CONNEXIN43, CX43, Cx43alpha1, DFNB38, GJAL, HSS, MGC93610, Npm1, ODDD	gap junction protein, alpha 1, 43kDa	A_52_P174915	1,287	3,13E-15	8	Plasma Membrane	transporter			2697	14609	24392
GPI	AMF, DKFZp686C13233, G6PI, Glucose phosphate isomerase 1, Gnpda, GNPI, Gpi-1r, Gpi-1s, Gpi-1t, GPI1, MF, MGC113776, Neuroleukin, NK, NK/GPI, NLK, Org, PGI, PHI, SA-36	glucose-6-phosphate isomerase	A_52_P347412	2,337	5,48E-07	6, 7, 12, 20	Extracellular Space	enzyme	Unspecified Application		2821	14751	292804
GREB1	5730583K22Rik, 9130004E13, AF180470, AU023194, KIAA0575, mKIAA0575	growth regulation by estrogen in breast cancer 1	A_51_P127695	-1,985	6,64E-13	3	Cytoplasm	other	Diagnosis		9687	268527
GSTO1	AA407097, AI194287, AU018802, DKFZp686H13163, GSH-dependent DHA Reductase, GST HOMOLOG, GSTTLp28, GSTX, MGC94845, P28	glutathione S-transferase omega 1	A_51_P155313	-1,139	6,63E-07	3	Cytoplasm	enzyme	Unspecified Application		9446	14873	114846
GSTT1	AI255817, clone 322B1, EC 2.5.1.18, Gstt1-1, GSTYRS	glutathione S-transferase theta 1	A_51_P179664	1,425	1,29E-08	3	Cytoplasm	enzyme	Diagnosis, Efficacy		2952	14871	25260
HDAC9 (includes EG:9734)	AV022454, D030072B18, D030072B18Rik, DKFZp779K1053, HD7, HD7B, HD9, HDAC, HDAC C, HDAC7, HDAC7B, Hdac9, HDAC9B, HDAC9FL, HDRP, KIAA0744, MITR, mKIAA0744, RGD1563092	histone deacetylase 9	A_51_P204031	3,811	7,84E-18	3	Nucleus	transcription regulator		tributyrin, belinostat, pyroxamide, vorinostat, romidepsin	9734	79221	500642
HLA-A	A-28, Aw-24, Aw-33, Aw-34, Aw-66, Aw-68, Aw-69, Aw-74, Aw-80, FLJ26655, H2-Q10, HLA A2, HLA A2.1, HLA-A*0226, HLA-A1, LOC100133382, major histocompatibility complex, class I, A, Q10, Qa10	major histocompatibility complex, class I, A	A_51_P230269	-1,896	1,64E-12	8	Plasma Membrane	transmembrane receptor	Efficacy		3105	15007
HOXB2	AI894218, Hox-2.8, HOX2, HOX2H, Hoxbes2, K8	homeobox B2	A_52_P15300	1,782	1,70E-11	4	Nucleus	transcription regulator	Diagnosis		3212	103889	303489
HOXB6	Hox-2.2, HOX2, HOX2B, HU-2, RGD1562142	homeobox B6	A_51_P232207	1,421	4,45E-09	4	Nucleus	transcription regulator	Diagnosis		3216	15414	497986
HPGD	15-HYDROXY PROSTAGLANDIN DEHYDROGENASE, 15-PGDH, AV026552, Hydroxyprostaglandin Dehydrogenase, MGC14001, PGDH, PGDH1, SDR36C1	hydroxyprostaglandin dehydrogenase 15-(NAD)	A_51_P458778	-1,803	7,03E-12	10	Cytoplasm	enzyme	Prognosis		3248	15446	79242
HS3ST3A1	30ST3A1, 3Ost3a, 3OST3A1, h3-OST-3A, HS3ST3A, RGD1561262	heparan sulfate (glucosamine) 3-O-sulfotransferase 3A1	A_51_P515120	-1,863	6,50E-09	17	Cytoplasm	enzyme			9955	15478	363618
HSP90B1	ECGP, ENDOPLASMIN, ERP99, FLJ22209, GP96, GRP94, HSP GP96 PRECURSOR, HSP96, TA-3, TARG2, TRA1	heat shock protein 90kDa beta (Grp94), member 1	A_52_P590546	-1,544	5,14E-10	5	Cytoplasm	other		17-dimethylaminoethylamino-17-demethoxygeldanamycin, IPI-504, cisplatin	7184	22027	362862
ICOSLG	AU044799, B7 homolog 2, B7-H2, B7-related protein-1, B7h, B7RP-1, BG071784, CD275, GI50, GL50, GL50-B, ICOS LIGAND, ICOSL, KIAA0653, LICOS, Ly115l, mKIAA0653, RGD1562791	inducible T-cell co-stimulator ligand	A_51_P520966	1,376	1,54E-08	9	Plasma Membrane	other			23308	50723	499415
IDO1	IDO, IFN GAMMA INDUCIBLE INDOLEAMINE 2-3 DIOXYGENASE, INDO, INDOLE 2,3 DIOXYGENASE, INDOLEAMINE 2,3 DIOXYGENASE	indoleamine 2,3-dioxygenase 1	A_51_P307150	-5,888	8,47E-23	9, 15	Cytoplasm	enzyme	Diagnosis, Prognosis, Response to Therapy		3620	15930	66029
IFNG	IFG, IFI, IFN TYPE II, IFN-GAMMA, IFNG2, INTERFERON GAMMA, TYPE II INTERFERON	interferon, gamma	A_52_P68893	-4,547	8,65E-20	1	Extracellular Space	cytokine	Diagnosis, Efficacy, Unspecified Application		3458	15978	25712
IGJ	9530090F24Rik, AI323815, Ig joining chain, IGCJ, J CHAIN, JCH	immunoglobulin J polypeptide, linker protein for immunoglobulin alpha and mu polypeptides	A_51_P150710	2,628	1,42E-16	8	Extracellular Space	other			3512	16069	360922
IL24	C49A, FISP, IL10B, MDA-7, MOB5, ST16	interleukin 24	A_51_P401517	-2,223	7,25E-10	22	Extracellular Space	cytokine			11009	93672	170819
INHBA	Activin, ACTIVIN A, ACTIVIN BETA A, BETA A INHIBIN, Beta-A, EDF, FRP, Inhibin A, INHIBIN BETA A	inhibin, beta A	A_51_P239750	1,699	8,30E-11	6	Extracellular Space	growth factor	Diagnosis		3624	16323	29200
INHBB	ACTIVIN, activin AB beta polypeptide precursor, ACTIVIN B, ACTIVIN BETA B, Beta-B, Inhibin B, INHIBIN BETA B, MGC157939	inhibin, beta B	A_51_P325904	1,432	4,86E-09	6	Extracellular Space	growth factor			3625	16324	25196
IQGAP2	4933417J23RIK, A630053O10, AI788777	IQ motif containing GTPase activating protein 2	A_52_P65494	-1,137	7,02E-07	11, 20	Cytoplasm	other			10788	544963
ITGB6	2210409C20Rik, 4831415H04Rik, Alpha-v beta-6 Integrin, INTEGRIN BETA 6, MGC94023	integrin, beta 6	A_51_P161054	1,530	1,87E-08	2	Plasma Membrane	other	Diagnosis		3694	16420	311061
ITLN1	FLJ20022, hIntL, HL-1, INTL, ITLN, Itln2, Itlna, Lactoferrin receptor, LFR, MGC124684, MGC183671, mLfR, omentin	intelectin 1 (galactofuranose binding)	A_51_P147987	-3,585	2,02E-11	5	Plasma Membrane	other			55600	16429	498284
KCNK3	cTBAK-1, K2p3.1, OAT1, rTASK, TASK, TASK-1, TBAK1	potassium channel, subfamily K, member 3	A_51_P292221	2,284	7,21E-15	1	Plasma Membrane	ion channel		nicorandil, amiodarone	3777	16527	29553
KDELR1	8030486F04Rik, AW215843, ERD2, ERD2.1, HDEL, KDEL RECEPTOR, KDELR, MGC109169, PM23	KDEL (Lys-Asp-Glu-Leu) endoplasmic reticulum protein retention receptor 1	A_52_P596541	-1,230	1,38E-07	18	Cytoplasm	transporter	Unspecified Application		10945	68137	361577
KLF8	A830097P10RIK, BKLF3, DKFZp686O08126, MGC138314, RGD1565831, ZNF74, ZNF741	Kruppel-like factor 8	A_52_P206861	2,982	4,03E-17	10	Nucleus	other			11279	245671	302582
KLF11	9830142A17, D12Ertd427e, FKLF, FKLF1, MODY7, Tcfcp2l2, TIEG2, Tieg2b, TIEG3	Kruppel-like factor 11	A_52_P474002	-2,088	1,03E-13	21	Nucleus	transcription regulator			8462	194655	313994
KLK2	0610007D04Rik, Egfbp-1, Egfbp-3, Egfbp2, Epidermal Growth Factor-Binding Protein Type A, Gk27, hK2, HNP, K2, Kal, Klk1, Klk11, KLK16, Klk1b1, Klk1b11, Klk1b16, Klk1b21, Klk1b22, Klk1b24, Klk1b26, Klk1b27, Klk1b3, Klk1b4, Klk1b5, Klk1b6, Klk1b8, Klk1b9, Klk21, KLK21L, KLK22, Klk24, Klk26, KLK27, KLK2A2, Klk5, Klk6, Klk8, Klk9, MGC118112, MGC12201, MGC18615, mGK-1, mGK-11, mGk-16, mGk-21, mGk-22, m…	kallikrein-related peptidase 2	A_51_P389929	1,952	5,76E-12	7, 11	Extracellular Space	peptidase	Efficacy, Prognosis		3817	18048|16616|16612|16622|16619|13646|18050|16613|16624|16623|16615|16617|13648|16618
LCN2	24P3, Alpha2u globulin related, AW212229, LIPOCALIN 2, MSFI, NEUTROPHIL LIPOCALIN, NGAL, NRL, SIDEROCALIN, Sip24, Uterocalin	lipocalin 2	A_51_P510156	3,263	1,04E-18	9, 10	Extracellular Space	transporter	Diagnosis, Unspecified Application		3934	16819	170496
LGI1	BB130740, EPITEMPIN, EPT, ETL1, IB1099, MGC105310	leucine-rich, glioma inactivated 1	A_52_P298394	1,611	6,79E-10	1	Plasma Membrane	other			9211	56839	252892
LHX6	LHX6.1, MGC119542, MGC119544, MGC119545	LIM homeobox 6	A_52_P497908	1,484	8,45E-09	13	Nucleus	transcription regulator			26468	16874	311901
LTF	Csp82, GIG12, HLF2, LACTOFERRIN, Lactotransferrin, LF, MMS10R, Ms10r	lactotransferrin	A_51_P188141	5,993	1,31E-22	5	Extracellular Space	peptidase	Unspecified Application		4057	17002	301034
LYVE1	1200012G08Rik, CRSBP-1, HAR, XLKD1	lymphatic vessel endothelial hyaluronan receptor 1	A_52_P686785	1,319	4,17E-08	4	Plasma Membrane	transmembrane receptor	Disease Progression		10894	114332	293186
MAT2A	AdoMet Synthetase alpha2, D630045P18Rik, MATA2, MATII, MGC6545, S-ADENOSYLMETHIONINE SYNTHETASE, SAMS2	methionine adenosyltransferase II, alpha	A_51_P500344	1,515	8,42E-10	4	Cytoplasm	enzyme			4144	232087	171347
MCM10	2410041F14RIK, AU018508, C330019M07Rik, C79164, CNA43, DNA43, MGC126776, PRO2249	minichromosome maintenance complex component 10	A_51_P212682	-2,279	8,54E-15	3	Nucleus	other			55388	70024	307126
MFAP3L	4933428A15RIK, 5430405D20Rik, AI461995, AW125052, KIAA0626, mKIAA0626, NYD-sp9	microfibrillar-associated protein 3-like	A_52_P139569	1,924	1,13E-12		unknown	other			9848	71306	306424
MGP	GIG36, LOC223886, Matrix gamma-carboxyglutamate, MATRIX GLA, MGLAP, NTI	matrix Gla protein	A_51_P426270	1,811	6,18E-12	5	Extracellular Space	other			4256	17313	25333
MME	6030454K05Rik, C85356, CALLA, CD10, DKFZp686O16152, ENDOPEPTIDASE 24.11, Enkephalinase, MGC126681, MGC126707, MGC93576, NEP, NEPRILYSIN	membrane metallo-endopeptidase	A_52_P429723	-2,277	7,79E-15	11	Plasma Membrane	peptidase	Diagnosis, Efficacy		4311	17380	24590
MMP3	CHDS6, MGC126102, MGC126103, MGC126104, MT3-MMP, SL-1, SLN-1, STMY, STMY1, STR-1, STROMELYSIN, STROMELYSIN1, Transin, Transin-1 Metalloprotease	matrix metallopeptidase 3 (stromelysin 1, progelatinase)	A_51_P255699	3,876	1,03E-13	1, 24	Extracellular Space	peptidase	Diagnosis		4314	17392	171045
MS4A1	AA960661, B1, Bp35, CD20, Fcer1b, LEU-16, Ly-44, MGC3969, MS4A2, S7	membrane-spanning 4-domains, subfamily A, member 1	A_51_P277683	-2,471	5,29E-15	11	Plasma Membrane	other	Efficacy, Prognosis	tositumomab, rituximab, ofatumumab, IMMU-106, ibritumomab tiuxetan	931	12482	309217
MSMB	BETA MICROSEMINOPROTEIN, beta-MSP, HPC13, IGBF, IMMUNOGLOBULIN BINDING FACTOR, MSP, MSPB, PIP, PN44, PRPS, PSP, PSP-94, PSP57	microseminoprotein, beta-	A_52_P125636	-5,070	3,07E-22	5, 14	Extracellular Space	other			4477	17695	29311
MSX1	AA675338, AI324650, HOX7, Hox7.1, HYD1, msh, STHAG1	msh homeobox 1	A_51_P218196	0,938	3,95E-08	4	Nucleus	transcription regulator			4487	17701	81710
MT1E	AA409533, LOC682651, LOC689415, Metallothionein 2, MT-II, MT1, MT1B, Mt2, Mt2a, MTD	metallothionein 1E	A_51_P246317	-2,525	3,95E-16	7	Cytoplasm	other			4493	17750	689415
MT1F	METALLOTHIONEIN 1, METALLOTHIONEIN 1F, Metallothionein2, MGC32732, Mt, MT-I, MT1, Mt1a, Mt2, Thionein	metallothionein 1F	A_51_P294979	-2,287	1,40E-44	6, 7, 12	Cytoplasm	other			4494	17748	24567
MYB (includes EG:4602)	AI550390, C-MYB, c-myb CDS, efg, M16449, MGC18531, Myb, RGD1560020	v-myb myeloblastosis viral oncogene homolog (avian)	A_51_P375543	1,157	1,35E-12	4	Nucleus	transcription regulator			4602	17863	498982
MYH4	AI506973, BETA MYHC, FMHC, Mhc2a, MHC2B, MYH2B, MyHC-2B, MyHC-IIb, Myhsf, Myosin heavy chain type iib	myosin, heavy chain 4, skeletal muscle	A_52_P602147	4,218	1,19E-20	2	Plasma Membrane	other			4622	17884	360543
MYH8	4832426G23RIK, AI327267, gtMHC-F, KIAA4211, Mhc neonatal type, Mhc of neonatal type, Mhc-perinatal, mKIAA4211, MyHC-peri, MyHC-pn, Myhs-p, Myosin	myosin, heavy chain 8, skeletal muscle, perinatal	A_51_P143296	2,540	3,60E-16	2	Cytoplasm	other			4626	17885	252942
MYH10	5730504C04Rik, 9330167F11Rik, Fltn, II-B, MCH-B, MGC115764, MGC134913, MGC134914, mKIAA3005, MYHN2, Myosin IIB, Nm HC myosin B, NMHC, NMHC II-B, NMHC-B, NMMHC-B, Nonmuscle myosin II, NONMUSCLE MYOSIN2B, SMEMB	myosin, heavy chain 10, non-muscle	A_52_P680681	1,307	1,09E-07	2	Cytoplasm	other	Unspecified Application		4628	77579	79433
NCOA4	1110034E15RIK, 4432406M01Rik, 70 kDa AR-activator, AI227008, ARA70, ARA70N, DKFZp762E1112, EG627557, ELE1, ELE1 ALPHA, Gm6768, MGC103382, MGC72479, PTC3, RFG	nuclear receptor coactivator 4	A_51_P151983	-1,593	2,34E-10	3	Nucleus	transcription regulator			8031	27057|627557	619385
NEK6	1300007C09Rik, SID6-1512	NIMA (never in mitosis gene a)-related kinase 6	A_51_P413539	1,261	1,67E-07	18	Nucleus	kinase			10783	59126	360161
NKX3-1	bagpipe, BAPX2, BAX, MGC124859, NKX3, NKX3.1, NKX3A	NK3 homeobox 1	A_51_P409408	-1,202	2,16E-07	6	Nucleus	transcription regulator			4824	18095	305999
NOV	C130088N23Rik, CCN3, IGFBP-RP3, IGFBP9, NOVH	nephroblastoma overexpressed gene	A_52_P105537	1,193	9,57E-07	6	Extracellular Space	growth factor			4856	18133	81526
OSMR	c12, MGC150626, MGC150627, MGC75127, OSMR BETA, OSMRB	oncostatin M receptor	A_51_P319460	1,443	3,06E-09	22	Plasma Membrane	transmembrane receptor	Diagnosis, Efficacy, Unspecified Application		9180	18414	310132
PBK	2810434B10Rik, AW538537, CT84, D14Ertd732e, FLJ14385, Nori-3, SPERMATOGENESIS RELATED PROTEIN KINASE, SPK, TOPK	PDZ binding kinase	A_51_P230098	2,575	1,27E-13	5	Cytoplasm	kinase			55872	52033	290326
PDE3A	A930022O17Rik, C87899, CGI-PDE, NONFUNCTIONAL FOLATE BINDING, Phosphodiesterase 3a, RNPDE3A	phosphodiesterase 3A, cGMP-inhibited	A_52_P421881	2,561	1,21E-12	11, 18	Cytoplasm	enzyme		dyphylline, nitroglycerin, medorinone, aminophylline, cilostazol, dipyridamole, amrinone, tolbutamide, theophylline, pentoxifylline	5139	54611	50678
PDZK1	1700023D20Rik, 2610507N21Rik, 4921513F16Rik, AI267131, AI314638, AL022680, CAP70, CLAMP, D3Ertd537e, mPDZK1, NHERF3, PDZD1, Sodium sulfate cotransporter	PDZ domain containing 1	A_51_P261737	-1,509	9,40E-10	3	Plasma Membrane	transporter			5174	59020	65144
PEX11A	MGC119947, MGC138534, Peroxisomal biogenesis factor, PEX11-ALPHA, Pex11p, Pmp26p	peroxisomal biogenesis factor 11 alpha	A_51_P456957	2,398	0,00E00	12	Cytoplasm	other			8800	18631	85249
PITX1	BFT, CCF, P-OTX, PTX1	paired-like homeodomain 1	A_52_P522255	3,651	3,64E-18	20	Nucleus	transcription regulator			5307	18740	113983
PKHD1	AI118496, AI182499, ARPKD, DKFZp686C01112, FCYT, FLJ46150, FPC, PKHD1 isoform 1, TIGM1	polycystic kidney and hepatic disease 1 (autosomal recessive)	A_52_P377941	3,797	3,50E-19	17	Plasma Membrane	other			5314	241035	301287
PLA2G4A	CPLA2, CPLA2-ALPHA, Ipla2beta, MGC126350, p85CPLA2, Pla2c, PLA2G4	phospholipase A2, group IVA (cytosolic, calcium-dependent)	A_51_P402760	1,603	2,34E-10	11, 21	Cytoplasm	enzyme			5321	18783	24653
PLAT	alteplase, alteplase, recombinant, AU020998, AW212668, D8Ertd2e, DKFZp686I03148, MGC18508, PATISS, SCTPA, T-PA, tissue plasminogen activator	plasminogen activator, tissue	A_51_P301566	1,452	2,83E-09	6	Extracellular Space	peptidase	Efficacy, Prognosis, Safety, Unspecified Application		5327	18791	25692
PLAU	ATF, MGC124931, MGC139972, SCUPA, U-PA, uPA 50 kd form, UPA-H, UPAM, URK, UROKINASE	plasminogen activator, urokinase	A_52_P302433	4,623	1,75E-18	6, 24	Extracellular Space	peptidase	Disease Progression, Efficacy, Prognosis		5328	18792	25619
PLAUR	CD87, Par, Plaur3, U-PAR, uPAR-2, UPAR-3, Urinary plasminogen activator receptor 2, URKR, UROKINASE TYPE PLASMINOGEN RECEPTOR, Urokinase-type plasminogen activator receptor	plasminogen activator, urokinase receptor	A_52_P681310	2,335	6,48E-15	6	Plasma Membrane	transmembrane receptor	Diagnosis, Disease Progression		5329	18793	50692
PPP3CC	Calcineurin a gamma, CALNA3, Calnc, Cna gamma, CNA3, PP2B A-SUBUNIT ALPHA3, PP2Bgamma	protein phosphatase 3, catalytic subunit, gamma isozyme	A_51_P245405	1,753	5,17E-11	11	unknown	phosphatase		ISAtx-247, tacrolimus, pimecrolimus, cyclosporin A	5533	19057	171378
PRDX6	1 CYS PEROXIREDOXIN, 1-Cys, 1-Cys PRX, 9430088D19RIK, AA690119, AIPLA2, ANTI-OXIDANT PROTEIN2, Antioxidant Enzyme B166, AOP2, Aop2-rs3, Brp-12, CP-3, GPx, KIAA0106, KIAA106, LPLA2, Ltw-4, Lvtw-4, MGC46173, mKIAA0106, NSGP, NSGPx, ORF06, p29, PEROXIREDOXIN 6, Prdx5, PRDX6-RS3, PRX, PRX6, PrxV	peroxiredoxin 6	A_52_P388359	-3,073	2,30E-18	10, 21	Cytoplasm	enzyme	Unspecified Application		9588	11758	94167
PRLR	AI987712, hPRLrI, MGC105486, Pr-1, Pr-3, PRL RECEPTOR, Prlr intermediate, Prlr short, Prlr-rs1, PROLACTIN RECEPTOR, RATPRLR	prolactin receptor	A_51_P264673	-1,862	2,94E-12	22	Plasma Membrane	transmembrane receptor			5618	19116	24684
PTPRT	KIAA0283, mKIAA0283, PTP-RHO, RPTP-rfo, RPTPrho	protein tyrosine phosphatase, receptor type, T	A_51_P395373	-2,924	1,95E-14	12	Plasma Membrane	phosphatase			11122	19281	362263
QPCT (includes EG:25797)	5730422A13Rik, GCT, glutaminyl cyclase, QC, QPCT, RGD1562284	glutaminyl-peptide cyclotransferase	A_51_P497295	3,042	1,51E-17	20	Cytoplasm	enzyme			25797	70536	313837
RASGRP4		RAS guanyl releasing protein 4	A_52_P122572	2,534	1,09E-13	24	Cytoplasm	other			115727	233046	170668
RELN	PRO1598, Reelen, reeler, REELIN, RL	reelin	A_51_P365369	0,869	1,01E-07	6	Extracellular Space	peptidase			5649	19699	24718
RGS2	G0/G1 switch regulatory protein 8, G0S8, GOS8, Regulator of g protein signaling, Regulator of g-protein signaling 2	regulator of G-protein signaling 2, 24kDa	A_52_P378968	1,470	2,10E-09	11	Nucleus	other			5997	19735	84583
RXRG	MGC109416, NR2B3, RXR GAMMA, RXRC	retinoid X receptor, gamma	A_51_P513311	3,812	2,04E-20	5	Nucleus	ligand-dependent nuclear receptor	Unspecified Application	bexarotene, retinoic acid, 9-cis-retinoic acid	6258	20183	83574
S100A9	60B8AG, AW546964, BEE22, CAGB, calgranulin B, CFAG, CGLB, GAGB, L1AG, Leukocyte l1 complex heavy chain, LIAG, MAC387, MIF, MIGRATION INHIBITORY FACTOR RELATED PROTEIN 14, MRP14, NIF, P14	S100 calcium binding protein A9	A_51_P402943	2,769	5,96E-17	23	Cytoplasm	other	Diagnosis, Unspecified Application		6280	20202	94195
S100A11	cal, calgizzarin, calizzarin, EG665509, Emap1, EMAPI, MGC107585, MLN70, RGD1563581, S100a14, S100C	S100 calcium binding protein A11	A_51_P155643	1,589	2,38E-10	2	Cytoplasm	other			6282	665509|20195	502110
SDF2L1	LOC683036, Sdf211	stromal cell-derived factor 2-like 1	A_51_P280446	-1,683	4,92E-11	15	Cytoplasm	other			23753	64136	680945
SELP	CD62, CD62P, CD62P antigen, FLJ45155, GMP140, GMRP, GRMP, LECAM3, MGC124632, MGC129336, MGC129337, P-SELECTIN, PADGEM, PSEL, PSELECT	selectin P (granule membrane protein 140kDa, antigen CD62)	A_51_P211854	1,833	2,91E-29	5	Plasma Membrane	other	Efficacy, Unspecified Application		6403	20344	25651
SERPINF1	AI195227, DMRS91, EPC-1, PEDF, PEDFL, PIG35, pigment epithelium-derived factor, Sdf3	serpin peptidase inhibitor, clade F (alpha-2 antiplasmin, pigment epithelium derived factor), member 1	A_51_P517075	1,260	7,88E-08	5	Extracellular Space	other			5176	20317	287526
SLC12A8	CCC9, DKFZp686L18248, E330020C02Rik, FLJ23188	solute carrier family 12 (potassium/chloride transporters), member 8	A_51_P476618	-1,560	4,29E-10		unknown	transporter			84561	171286	266733
SLC22A1	HOCT1, Lx1, MGC14019, MGC93570, OCT1, oct1 cds, Oct1a, Orct, Orct1, Organic Cation Transporter, Roct1	solute carrier family 22 (organic cation transporter), member 1	A_52_P229972	-1,351	1,50E-08	13	Plasma Membrane	transporter	Diagnosis, Efficacy		6580	20517	24904
SLC26A3	9030623B18Rik, 9130013M11Rik, AV376035, CLD, DRA	solute carrier family 26, member 3	A_52_P185162	-1,603	2,02E-10	3	Plasma Membrane	transporter			1811	13487	114629
SLC27A2	ACSVL1, FACVL1, FATP2, hFACVL1, HsT17226, MGC93337, Vlac, VLACS, Vlcas, VLCS	solute carrier family 27 (fatty acid transporter), member 2	A_52_P154971	5,054	3,31E-20	1, 10	Cytoplasm	transporter			11001	26458	65192
SLC5A3	AA623876, BF642829, Na/Myoinositol Cotransporter, SMIT, Smit1, SMIT2	solute carrier family 5 (sodium/myo-inositol cotransporter), member 3	A_51_P112762	-1,781	2,15E-09	17	Plasma Membrane	transporter			6526	53881	114507
SLC5A8	AIT, MGC125354, MGC19357, RGD1564146, SMCT, SMCT1	solute carrier family 5 (iodide transporter), member 8	A_51_P107315	5,233	3,07E-22	3	unknown	transporter			160728	216225	500820
SLC7A5	4f2 light chain, 4F2LC, CD98, CD98 LIGHT CHAIN, CD98LC, D0H16S474E, D16S469E, E16, E16/TA1, hLAT1, Large neutral amino acid transporter 1, LAT1, MPE16, TA1	solute carrier family 7 (cationic amino acid transporter, y+ system), member 5	A_51_P273639	-1,236	1,19E-07	10	Plasma Membrane	transporter	Diagnosis		8140	20539	50719
SPHK1	1110006G24Rik, HSK, SK1, Sphingosine kinase, SPHK, SPHK1A, Spk1	sphingosine kinase 1	A_52_P400436	1,494	1,11E-08	2, 16	Cytoplasm	kinase	Diagnosis, Disease Progression, Prognosis		8877	20698	170897
SPINK1	LOC266602, MGC107555, p12, PCTT, PSTI, Psti-1, Psti-ii, Spink3, TATI, Tilp	serine peptidase inhibitor, Kazal type 1	A_51_P365516	6,077	6,80E-23	1	Extracellular Space	other	Prognosis		6690	20730	266602|24833
SYNGR1	MGC:1939, p29, R75468, Synaptogyrin 1, Syngr1b	synaptogyrin 1	A_51_P270733	2,058	7,17E-13	21	Plasma Membrane	transporter			9145	20972	29205
SYT12	Srg1, SYT11, sytXII	synaptotagmin XII	A_51_P384831	2,638	1,55E-15	5	Plasma Membrane	transporter			91683	171180	191595
SYT17	B/K, BK	synaptotagmin XVII	A_51_P469688	-1,826	2,16E-09	14	Plasma Membrane	other			51760	110058	192189
TAF15	2610111C21Rik, 68kDa, hTAFII68, Npl3, RBP56, TAF2N, TAF68, TAFII68	TAF15 RNA polymerase II, TATA box binding protein (TBP)-associated factor, 68kDa	A_51_P257583	-1,492	2,48E-09	17	Nucleus	transcription regulator			8148	70439	287571
TBL2	C76179, DKFZp434N024, MGC134739, WBSCR13, WS-betaTRP, WS-bTRP	transducin (beta)-like 2	A_52_P499206	-1,715	1,98E-10	12	Plasma Membrane	other			26608	27368
TGFBR2	1110020H15Rik, AAT3, AU042018, DNIIR, FAA3, LDS1B, LDS2B, MFS2, RIIC, RIIDN, T BETA R2, TAAD2, TBETAR-II, TBR-II, TBRLL, TGF BETA RECEPTOR TYPE II, Tgf beta2 receptor, TGF-beta 2, TGF-BETA RECEPTOR 2, TGF-BETA RECEPTOR TYPE 2, TGF-BETA TYPE II RECEPTOR, TGFB receptor II, TGFbeta-RII, Tgfbr2T, Tgfbrii, TGFR-2, TRANSFORMING GROWTH FACTOR RECEPTOR TYPE 2	transforming growth factor, beta receptor II (70/80kDa)	A_51_P450573	1,523	7,40E-10	8	Plasma Membrane	kinase	Diagnosis		7048	21813	81810
THBS1	tbsp1, THBS, THROMBOSPONDIN-1, TS-1, TSP, TSP-1	thrombospondin 1	A_52_P363951	1,891	6,92E-12	6	Extracellular Space	other	Diagnosis, Efficacy, Prognosis		7057	21825	445442
TIMP4	LOC678834	TIMP metallopeptidase inhibitor 4	A_51_P355427	1,972	5,28E-13	1	Extracellular Space	other	Diagnosis, Prognosis		7079	110595	680130
TLR4	ARMD10, CD284, HTOLL, Ly87, Ran/M1, Rasl2-8, TOLL, Toll like receptor 4, TOLL RECEPTOR	toll-like receptor 4	A_51_P300806	1,122	6,25E-12	9	Plasma Membrane	transmembrane receptor		TAK-242	7099	21898	29260
TLR7	RGD1563357, Toll-like receptor 7	toll-like receptor 7	A_51_P371710	2,677	2,52E-09	9	Plasma Membrane	transmembrane receptor		UC-1V150, resiquimod, imiquimod	51284	170743	317468
TMEM97	1810014L12RIK, AI115531, Ai852985, AL022956, D11Bhm182e, MAC30, MGC102369, MGC105541, RGD1307423, RP23-399H5.9	transmembrane protein 97	A_51_P284565	-1,952	7,06E-13	3	Extracellular Space	other			27346	69071	303330
TMPRSS4	mCAP2, MGC29209, MT-SP2, TMPRSS3	transmembrane protease, serine 4	A_51_P446179	2,566	1,58E-15	19	Plasma Membrane	peptidase	Diagnosis		56649	214523	367074
TNNI2	AMCD2B, DA2B, FAST SKELETAL TROPONIN I, Fast tni, FSSV, fsTnI, Troponin 1, skeletal fast 2	troponin I type 2 (skeletal, fast)	A_51_P355122	1,975	6,41E-13	2	unknown	enzyme	Unspecified Application		7136	21953	29389
USP6NL	AI316785, KIAA0019, mKIAA0019, RN-TRE, TRE2NL	USP6 N-terminal like	A_51_P442719	1,974	3,72E-12	1, 15	Plasma Membrane	other			9712	98910	291309
WARS	GAMMA-2, IFI53, IFP53, TRPRS, TRYPTOPHANYL TRNA SYNTHETASE, WRS	tryptophanyl-tRNA synthetase	A_52_P35174	-1,834	4,33E-12	1	Cytoplasm	enzyme	Prognosis		7453	22375	314442
WNT1	INT1, sw, swaying, Wg	wingless-type MMTV integration site family, member 1	A_51_P366435	-1,276	8,02E-08	4	Extracellular Space	other	Diagnosis		7471	22408	24881
